# Supplementary material
Source: bioRxiv or medRxiv preprint supplement (https://www.biorxiv.org/highwire/filestream/34943/field_highwire_adjunct_files/1/119420-10.pdf)
Supplement: Supplementary file [file 119420-10.pdf]

accessory binary tree  
(114 strains)

gene presence/absence  
matrix (59,989 genes)

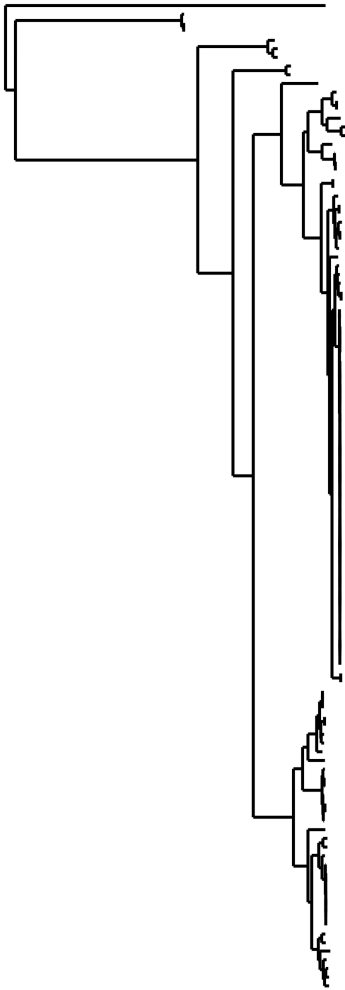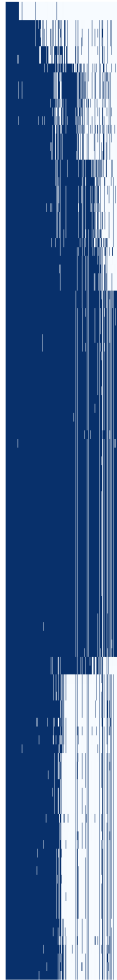

*B. cytotoxicus*  
*B. mycoides*  
*B. weihenstephanensis*

*B. anthracis*
